# Supplementary material for: Evidence for lithium superoxide-like species in the discharge product of a Li–O2 battery
Source: Royal Society of Chemistry journal article supplement (doi:10.1039/c3cp00069a), 2013-01-01
Supplement: c3cp00069a.pdf [file c3cp00069a.pdf]

## Supplementary Information

### Solvent preparation

The solvent TEGDME (Aldrich) is first soaked over a piece of Li metal for 10 hours to remove moisture. It is then distilled under vacuum and stored under Ar atmosphere until use. The activated carbon (AC) powders in this work are moisture sensitive. When the AC powders are not freshly prepared, they are further heated at 250°C under vacuum to remove internally adsorbed moisture before use.

### Porosity of the activated carbon

Nitrogen adsorption/desorption isotherm measurements are carried out to characterize the surface area and porosity of the prepared AC powders. The N<sub>2</sub> adsorption isotherm and the pore size distribution are shown in Figure S1. The N<sub>2</sub> adsorption isotherm of the AC shows a type I curve with a H4 hysteresis loop according to the IUPAC classification. The amount of adsorbed nitrogen increases quickly below 0.01 P/P<sub>0</sub> (relative pressure) as shown in the magnified view in the inset, which indicates that the AC contains large amounts of micropores (<2 nm). The hysteresis in the middle pressure range suggests the existence of mesopores. The size in the hysteresis loop is related to the mesopore volume and the connectivity of the pores. Figure S1 b shows the variation of pore size distribution evaluated by density function theory and the two dominant peaks are observed. One peak locates at ~1 nm and the other is ~3 nm that are consistent with the result shown in Figure S1 a. The pore volume and surface area of the AC are 2.4 cm<sup>3</sup>/g and 3838 m<sup>2</sup>/g, respectively.

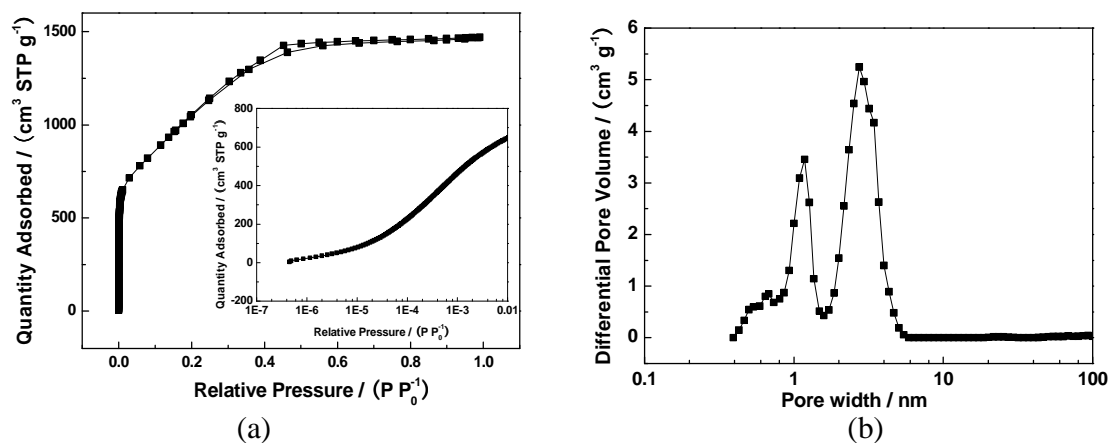

Figure S1 (a) Nitrogen adsorption/desorption isotherms at 77 K; (b) Pore size distribution of AC by density function theory

### Elemental analysis of the activated carbon



Table 1 shows elemental analysis of the activated carbon by X-ray fluorescence (XRF) spectrometer. This activated carbon possesses negligible amounts of Ni and V, but has potassium and calcium in the range of 1410 and 1170 ppm. The results show that this super activated carbon does not possess high content of transitional metal. The activated carbon that has been treated with acid removes all elements except K and a small amount of Cr as shown in Table 1. The acid treated AC gives a similar cell performance as the untreated AC.

Table 1 Elemental analysis of the activated carbon by X-ray fluorescence (XRF) spectrometer. Also give is the elemental analysis of an acid treated sample.

| Element | Amount (ppm) | Amount (acid treated sample) (ppm) |
|---------|--------------|------------------------------------|
| K       | 1410         | 1740                               |
| Si      | 444          | 125                                |
| Ca      | 1170         | 82.9                               |
| Cr      | 262          | 211                                |
| Fe      | 486          | 205                                |
| Ni      | 83.1         | 16.2                               |
| S       | 12.6         | 12.7                               |
| V       | 6.12         | 0                                  |
| Mn      | 31           | 0                                  |
| Co      | 7.85         | 0                                  |
| Cu      | 22.5         | 27.5                               |
| Zn      | 12.1         | 15.2                               |
| Sr      | 49.1         | 0                                  |
| Cl      | 100          | 181                                |
| C       | 995000       | 99700                              |

**Cycling data**

Figure S2 shows the cycling profile at 0.1 mA cm<sup>-2</sup> with a discharge capacity of 1000 mA h g<sup>-1</sup> obtained by controlling the discharge time. The charged capacity starts to fade after the first cycle, probably due to electrolyte decomposition.



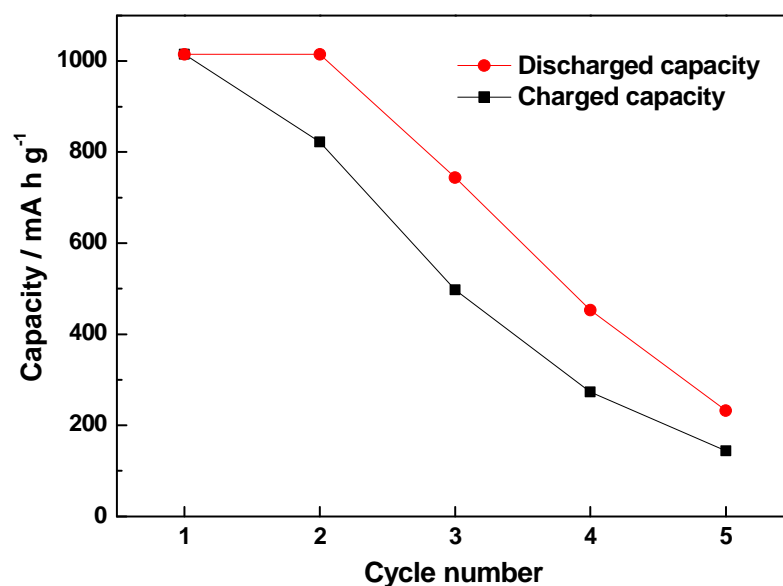

Figure S2. Variation of discharged and charged capacity on the number of cycles

### Additional SEM images

The size of the AC particles ranges from a few to tens of  $\mu\text{m}$ , as shown in Figure S3a. After discharge the toroidal particles grow on the surface and edges of AC particles with different size as shown in Figure S3b.

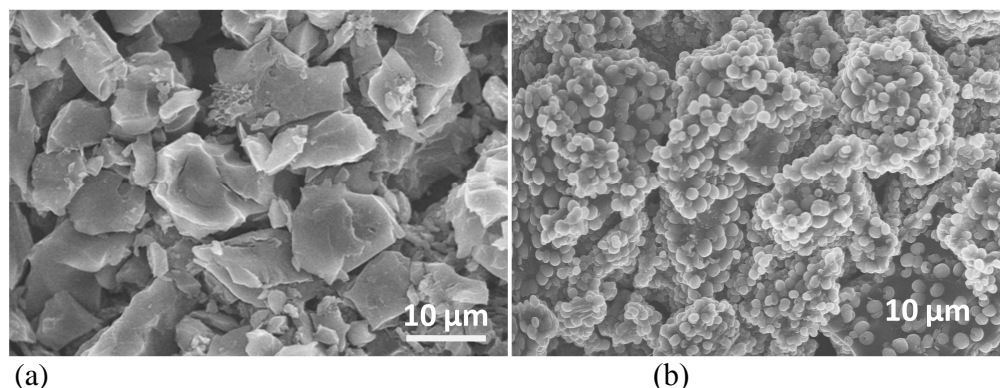

Figure S3 (a) the pristine activated carbon surface, (b) after discharge with 1000 mA h/g

### Simulation techniques:

In this work, two density functional methods were used. The first is the DFT planewaves method that implemented in the Vienna Ab Initio Simulation Package, which based on PBE functional spin polarized calculations. For the planewaves calculations, the projector augmented wave (PAW) method was used to represent the interaction between the core electrons and valence



electrons, and the Kohn-Sham valence states ( $2s$  for Li,  $2s2p$  for O) were expanded in plane wave basis sets up to a kinetic energy cutoff of 400 eV. This method was used to compute  $\text{LiO}_2$  crystal solid,  $\text{Li}_2\text{O}_2$  crystal solid and its surfaces.<sup>1</sup> The second is the B3LYP density functional method that based on the 6-31G(d) Gaussian-type basis set as implemented in the Gaussian09 code. This method was used to compute all the Raman spectra intensity of the  $\text{LiO}_2$ ,  $\text{Li}_2\text{O}$  molecule, and  $(\text{Li}_2\text{O}_2)_n$  clusters with  $n = 1-4, 16$ .<sup>2</sup>

### Oxygen oxidation state and its correlation with vibrational frequencies from DFT:

When the O-O stretching frequencies of DFT values are plotted against the oxidation state of the oxygen atom for  $\text{O}_2$ ,  $\text{LiO}_2$ , and  $\text{Li}_2\text{O}_2$ , a linear correlation is observed as indicated in Figure S4. This is simply because as  $\text{O}_2$  is reduced, the additional electrons occupy the  $\pi^*$  antibonding orbitals of the  $\text{O}_2$  molecule. Due to charge transfer from the lithium ions, the superoxide anionic oxygen species has one more electron in a  $\pi^*$ -level, and its spin configuration is  $S=1/2$  which yields the oxidation state  $\sim -1.0e$  for an  $\text{O}_2$  unit that forms a superoxide ( $\text{O}_2^-$ ). For the peroxide ion, the one extra electron fills up the  $\pi^*$ -level, and causes its spin moment to vanish ( $S=0$ ) and yields the oxidation state  $\sim -2.0 e$  ( $\text{O}_2^{2-}$ ). Thus, due to the simple electrostatic interaction from the extra electron in the  $\pi^*$ -orbital, the O-O bond strength is weakened and its stretching frequency goes down as the oxidation state of oxygen is increased. The extra electron in the  $\pi^*$ -orbital results in a larger O-O bond distance, e.g. 1.21 Å ( $\text{O}_2$  neutral),  $\sim 1.35$  Å ( $\text{O}_2^-$  superoxide species), and  $\sim 1.56$  Å ( $\text{O}_2^{2-}$  peroxide species).

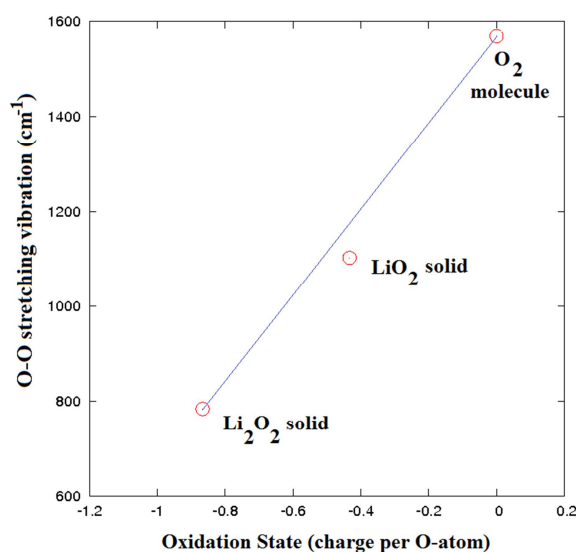

Fig. S4: The computed O-O stretching vibrational frequencies of  $\text{Li}_2\text{O}_2$ ,  $\text{LiO}_2$  solid, and  $\text{O}_2$  molecule based on VASP PBE planewave calculations. The oxidation state of individual O-atom is predicted based on Bader charge partition scheme.

### DFT evidence for unsaturated spins

In order to understand the presence of spins in the discharge product from Li- $\text{O}_2$  cell, we used DFT calculations to explore the possibility of magnetism present on the  $\text{Li}_2\text{O}_2$  surfaces. Instead of being exclusively dominated by peroxide species, we found that the presence of superoxide species with spins appears to be an important factor that yields the magnetic state solution to



these  $(\text{Li}_2\text{O}_2)_n$  stoichiometric surfaces and clusters. Based on our previous study in  $\text{Li}_2\text{O}$ ,  $\text{Li}_2\text{O}_2$  and  $\text{LiO}_2$  crystalline solid<sup>5</sup>, we constructed a few possible low index stoichiometric surfaces of  $\text{Li}_2\text{O}_2$  and studied their electronic properties. Given that the  $\text{Li}_2\text{O}_2$  crystal is expected to be a bulk insulator<sup>3-5</sup>, our DFT calculations predict that the electronic properties of the majority of the stoichiometric  $\text{Li}_2\text{O}_2$  surfaces are surprisingly distinctive from its  $\text{Li}_2\text{O}_2$  crystalline solid. From the low index stoichiometric surfaces of  $\text{Li}_2\text{O}_2$ , we found only the non-metallic  $[110]$  surface prefers a non-magnetic state (i.e. non-spin polarized solution), while the remaining surfaces (i.e.  $[100]$ ,  $[001]$ ,  $[1-10]$ ,  $[111]$ ,  $[1-11]$ ) prefer a magnetic state, i.e.  $S = \frac{1}{2}$  and 1 spin polarized solution with finite magnetization (Fig. S5). For these spin polarized stoichiometric surfaces, the magnetic spin states (spin polarized solution) are overall found to be energetically favorable over the non-magnetic state (non-spin polarized solution) within a range of 0.11 to 0.36 eV. As shown in Fig. S5, these spin polarized stoichiometric surfaces are predicted to be metallic-like and conductive with a finite density of state (DOS) cross the Fermi level ( $E_f$ ), similar to the metallic feature of the oxygen rich  $\text{Li}_2\text{O}_2$  surfaces (e.g. O-rich  $[001]$  surface) predicted recently<sup>6</sup>. From the site projected DOS in Fig. S5, the metallic states crossing  $E_f$  are mostly attributed to the surface bounded oxygen species with the presence of spin magnetization (Fig. S5). Through the charge partition scheme based on Bader charge analysis, the oxidation state (i.e. charge per-O atom or an  $\text{O}_2$ -dimer) of oxygen species can be determined. We found the majority of these surface bound oxygen species with finite spin magnetization are predicted to be a “superoxide”-like oxygen ions ( $\text{O}_2^-$ ), whereas the subsurface oxygen ions that with negligible spin magnetization (Fig. S5) are predicted to be the conventional non-magnetic “peroxide”-like oxygen ions ( $\text{O}_2^{2-}$ ). Similar features can also found in some O-rich  $\text{Li}_2\text{O}_2$  surfaces as shown in Fig. S6. Thus this confirms the observation of spins from our experimental SQUID measurement on  $\text{Li}_2\text{O}_2$  discharge product.

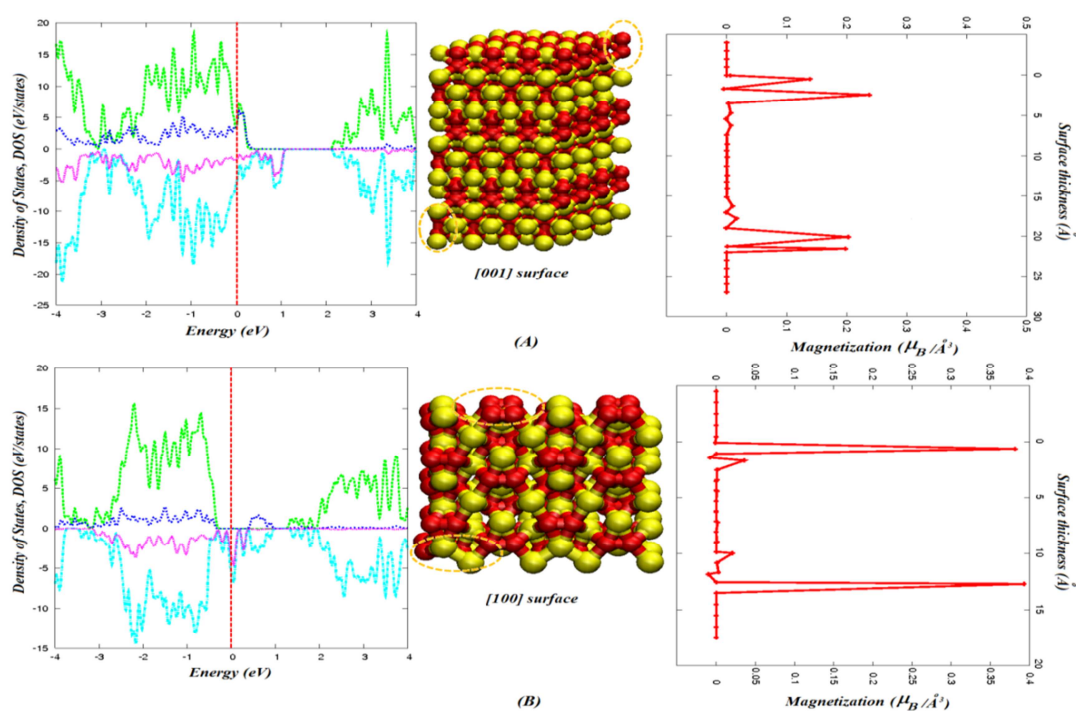



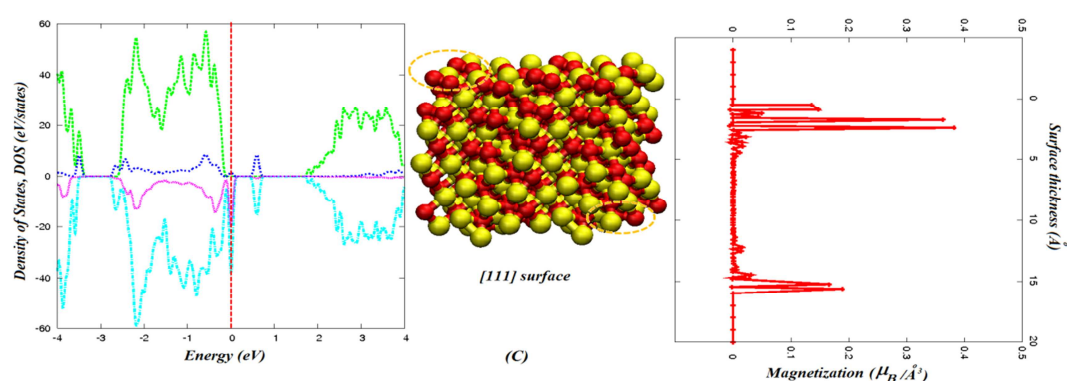

Fig. S5: The calculated spin density of states (DOS) (i.e. spin up and spin down) and site projected magnetization of the few selected low index stoichiometric  $\text{Li}_2\text{O}_2$  surfaces that prefers high spin states: (a) [001] (b) [100] (c) [111] surface. In the magnetization plot (right), the vertical axis represents the atomic position along the surface thickness, i.e. the top surface atoms appear at the top close to zero. The circled atoms represent the surface bound superoxide-like species which have large magnetization and finite DOS cross the Fermi level (i.e. at zero in red lines).

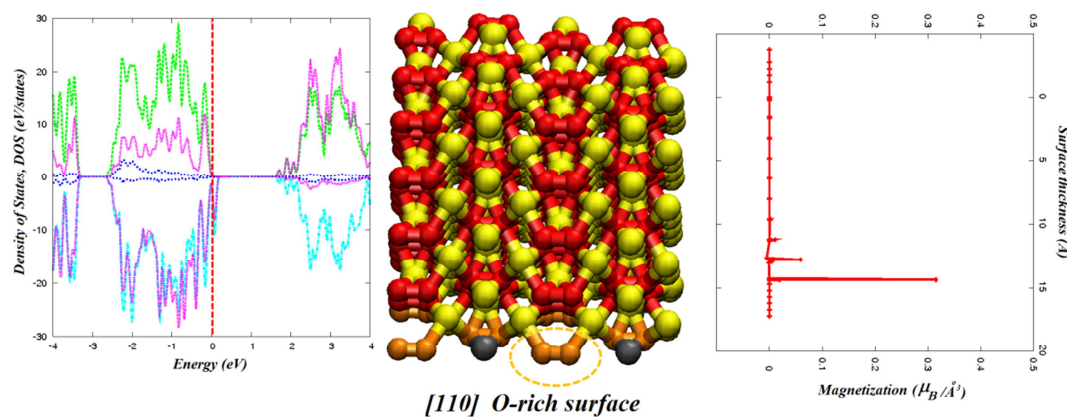



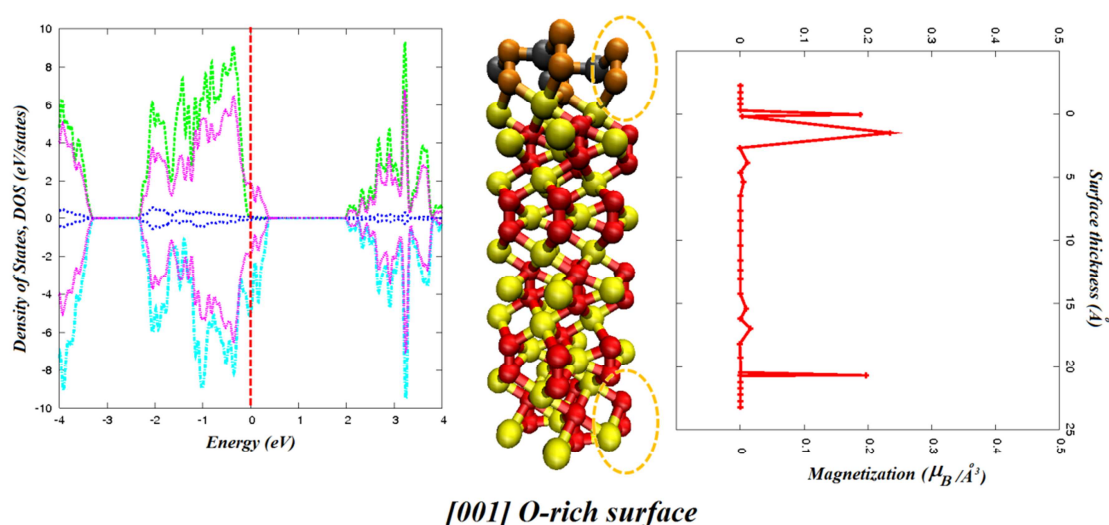

Fig. S6: The calculated spin density of states (DOS) (i.e. spin up and spin down) and site projected magnetization of a few selected low index O-rich  $\text{Li}_2\text{O}_2$  surfaces that prefer high spin states: (top) [110] O-rich surface (bottom) [001] O-rich surface. In the magnetization plot (right), the vertical axis represents the atomic position along the surface thickness, i.e. the top surface atoms appear at the top close to zero. The circled atoms represent the surface bound superoxide-like species that have large magnetization and finite DOS crossing the Fermi level (i.e. at zero in red lines). The O-rich layer is shown with  $\text{Li}^+$  (gray in color) and  $\text{O}^-$  (orange in color) atom.

## References

1. Lau, K. C.; Curtiss, L. A.; Greeley, J. *Journal of Physical Chemistry C* **2011**, 115, (47), 23625-23633.
2. Lau, K. C.; Assary, R. S.; Redfern, P. C.; Greeley, J. P.; Curtiss, L. A. *The Journal of Physical Chemistry C* **2012** DOI: 10.1021/jp306024f.
3. Mo, Y.; Ong, S.P.; Ceder, G. *Phys. Rev. B*, **2011**, 84, 205446.
4. Hummelshøj, J. S.; Blomqvist, J.; Datta, S.; Vegge, T.; Rossmeisl, J.; Thygesen, K. S.; Luntz, A. C.; Jacobsen, K. W.; Nørskov, J. K. *J. Chem. Phys.* **2010**, 132, 071101-4.
5. Garcia2011, Garcia-Lastra, J. M.; Bass, J. D.; Thygesen, K. S. *J. Chem. Phys.* **2011**, 135, 121101
6. Radin, M. D.; Rodriguez, J. F.; Tian, F.; Siegel, D. J. *J. Am. Chem. Soc.* **2012**, 134, 1093-1103.
